# Supplementary material
Source: PubMed Central journal article supplement (PMC6502648)
Supplement: NIHMS1520980-supplement-Table_S1.pdf [file NIHMS1520980-supplement-Table_S1.pdf]

**Supplementary Table S1. The sequences of the RT-PCR primer pairs used in this study**

| <b>Primers</b>      | <b>Primer sequences</b> |                            |
|---------------------|-------------------------|----------------------------|
| Rat<br>Collagen I   | Forward                 | 5'-ATCTCCTGGTGCTGATGGAC-3' |
|                     | Reverse                 | 5'-ACCTTGTTTGCCAGGTTTAC-3' |
| Rat<br>Collagen III | Forward                 | 5'-TGGTCCTCAGGGTGTAAGG-3'  |
|                     | Reverse                 | 5'-GTCCAGCATCACCTTTTGG-3'  |
| Rat<br>PAI-1        | Forward                 | 5'-CCTTCCAGAGTCCCATAACA-3' |
|                     | Reverse                 | 5'-CTGGCTCTTTCCACCTCT-3'   |
| Rat<br>Fibronectin  | Forward                 | 5'-CGAGGTGACAGAGACCACAA-3' |
|                     | Reverse                 | 5'-CTGGAGTCAAGCCAGACACA-3' |
| Rat<br>TNF-a        | Forward                 | 5'-ACTCCCAGAAAAGCAAGCAA-3' |
|                     | Reverse                 | 5'-CGAGCAGGAATGAGAAGAGG-3' |
| Rat<br>Rantes       | Forward                 | 5'-ATATGGCTCGGACACCACTC-3' |
|                     | Reverse                 | 5'-TGACAAAGACTGCAAGG-3'    |
| Rat<br>Actin        | Forward                 | 5'-CAGCTGAGAGGGAAATCGTG-3' |
|                     | Reverse                 | 5'-CGTTGCCAATAGTGATGACC-3' |
